# Supplementary material for: Cobalt-based metal organic framework as precursor to achieve superior catalytic activity for aerobic epoxidation of styrene
Source: Royal Society of Chemistry journal article supplement (doi:10.1039/c4ra03746d), 2014-01-01
Supplement: c4ra03746d1.pdf [file c4ra03746d1.pdf]

## Electronic Supporting Information

**Cobalt-based metal organic framework as precursor to  
achieve superior catalytic activity for aerobic epoxidation of  
styrene**

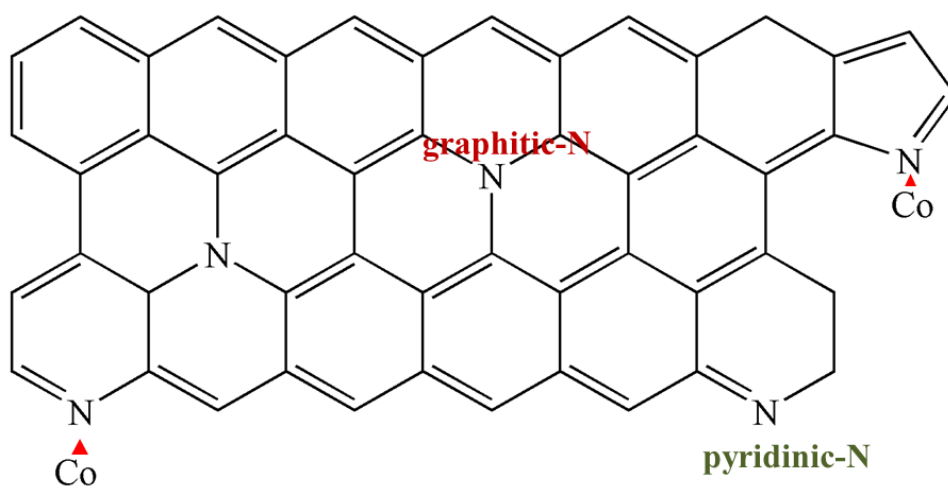

Fig. S1 Schematic representation of C-N-Co macrocyclic catalysts.

Table S1. Surface texture properties measured by nitrogen adsorption isotherms for all samples.

| Sample | BET surface area<br>[m <sup>2</sup> g <sup>-1</sup> ] | Micropore<br>diameter (Å) | Mesopore<br>diameter (Å) |
|--------|-------------------------------------------------------|---------------------------|--------------------------|
| ZC-600 | 282                                                   | 10-16                     | 20 - 40                  |
| ZC-700 | 224                                                   | 10-16                     | 20 - 40                  |
| ZC-800 | 193                                                   | 10-16                     | 20 - 40                  |
| ZC-900 | 94                                                    | 10-16                     | 20 - 40                  |
| ZIF-67 | 663                                                   | 8-11                      | -                        |
